# Supplementary material for: Low energy consumption fiber-type memristor array with integrated sensing-memory
Source: Royal Society of Chemistry journal article supplement (doi:10.1039/d1na00703c), 2022-01-01
Supplement: d1na00703c1.pdf [file d1na00703c1.pdf]

Supporting Information for

**Low energy consumption fiber-type memresistor array with integrated sensing-memory**

*Yanfang Meng*<sup>\*a,b,+</sup> *Jiuxue Zhu*<sup>c,+</sup>

a. Department of Engineering Mechanics, Tsinghua University, Beijing, 100084, China.

b. Key Laboratory of Advanced Optical Communication Systems and network, School of electronic engineering and computer science department, Peking University.

c. Key Laboratory of Microelectronic Devices and Integrated Technology, Institute of Microelectronics of the Chinese Academy of Sciences, Beitucheng West Road, Beijing 100029,

Email: [yanaimengmeng@126.com](mailto:yanaimengmeng@126.com).

**Supplementary Text**

**Figure S1.** Scanning electron microscopy (SEM) images of Ag-coated (left panel) carbon fibers and Pt-coated (right panel) carbon fibers

**Figure S2.** The typical  $I-V$  curve of device back-forward sweep

**Figure S3.** The typical  $I-V$  curve of sole PEDOT: PSS (red line) and sole ion gel (blue line).

**Figure S4.** The typical  $I-V$  curve of device under varied ion gel recipe

**Figure S5.** The pulse voltage posed on the device and the corresponding  $I-t$  curve

**Figure S6.** The typical  $I-V$  curve of device under varied compliment currents

**Figure S7.** The typical  $I-V$  curve of device under varied sweep range (-1~1V, -0.8V~0.8V, -0.6V~0.6V, -0.4V~0.4V)

**Figure S8.** The endurance of over 200 cycles under the 100  $\mu\text{s}/2\text{ V}$  programming pulses and 100  $\mu\text{s}/0.3\text{ V}$  read pulses, with a 1.8 ms wait time between each program and read pulse.

**Figure S9.** The typical  $I$ - $V$  curve of device Ag/PEDOT/Pt in fresh state (blank line) and for four months (blue line).

**Figure S10.** The typical  $I$ - $V$  curve of device with free-standing state, compressing state (50 kPa) and recovery state after experiencing pressure.

**Figure S11.** The typical  $I$ - $V$  curve of device with of memristor Pt/PEDOT:PSS-ion gel/Au (green line) and Pt/PEDOT:PSS-ion gel/Au(blank line)

**Figure S12.** The typical  $I$ - $V$  curve of device with P3HT as active material of memristor under varied sweep range (-1~1V, -0.8V~0.8V, -0.6V~0.6V, -0.4V~0.4V).

## Supplementary Figures

**Figure S1**

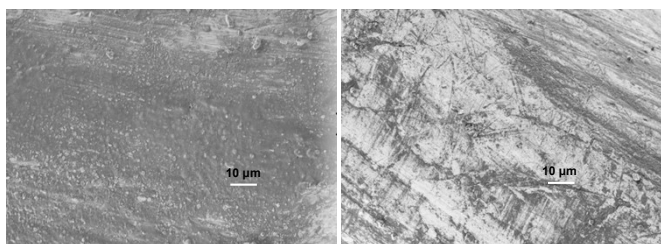

**Figure S1.** Scanning electron microscopy (SEM) images of Ag-coated (left panel) carbon fibers and Pt-coated (right panel) carbon fibers

**Figure S2**

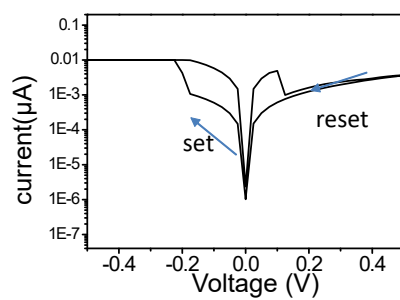

**Figure S2.** The typical  $I$ - $V$  curve of device back-forward sweep

**Figure S3**

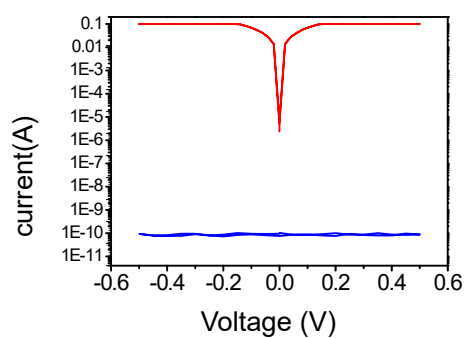

**Figure S3.** The typical  $I$ - $V$  curve of sole PEDOT: PSS (red line) and sole ion gel (blue line).

**Figure S4**

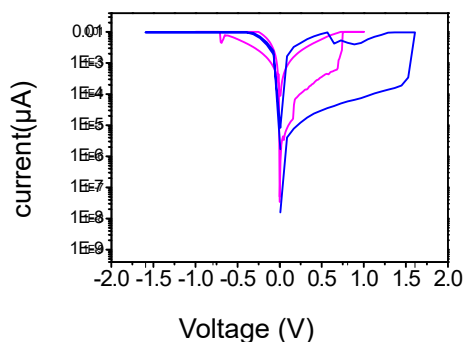

**Figure S4.** The typical  $I$ - $V$  curve of device under varied ion gel recipe (composed of 1-ethyl-3-methylimidazolium bis(trifluoromethyl sulfonyl)imide ([EMIM][TFSI]) ion liquid, poly(ethylene glycol) diacrylate (PEGDA) monomers and 2-hydroxy-2-methylpropiophenone (HOMPP) photo-initiator in a weight ratio of 1.72:0.4:0.12 (pink curve) and 4.5:0.4:0.12 (blue curve))

**Figure S5**

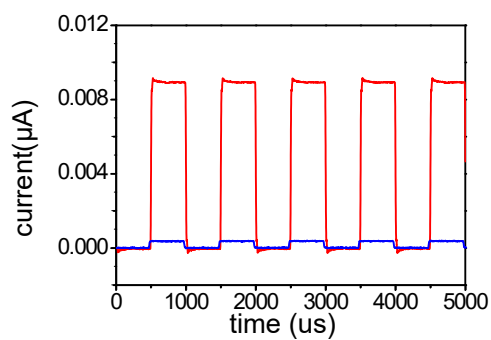

**Figure S5.** The pulse voltage posed on the device and the corresponding  $I$ - $t$  curve

**Figure S6**

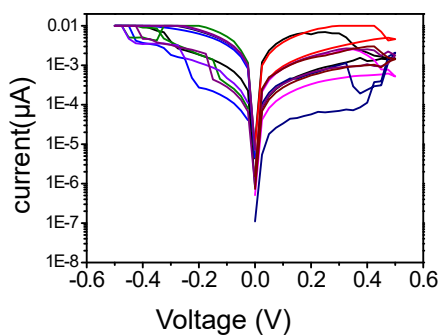

**Figure S6.** The typical  $I$ - $V$  curve of device under varied compliment currents

**Figure S7**

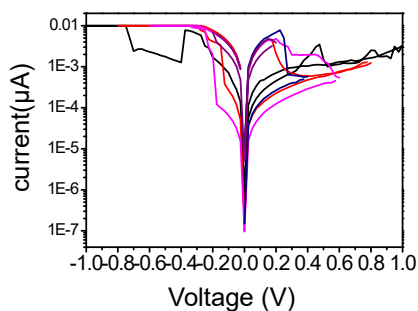

**Figure S7.** The typical  $I$ - $V$  curve of device under varied sweep range (-1~1V, -0.8V~0.8V, -0.6V~0.6V, -0.4V~0.4V)

**Figure S8**

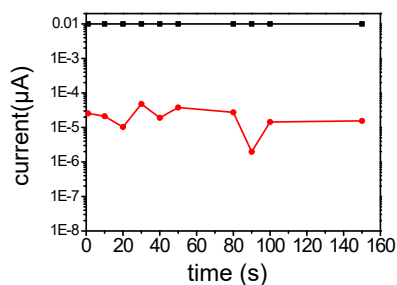

**Figure S8.** The endurance of over 200 cycles under the 100  $\mu$ s/2 V programming pulses and 100  $\mu$ s/0.3 V read pulses, with a 1.8 ms wait time between each program and read pulse.

**Figure S9**

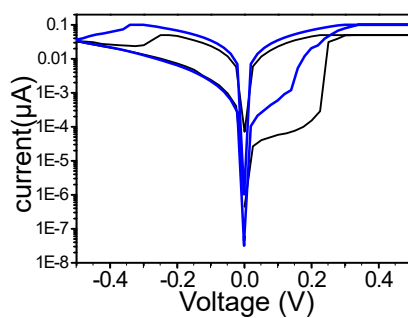

**Figure S9.** The typical  $I-V$  curve of device Ag/PEDOT/Pt in fresh state (blank line) and for four months (blue line).

**Figure S10**

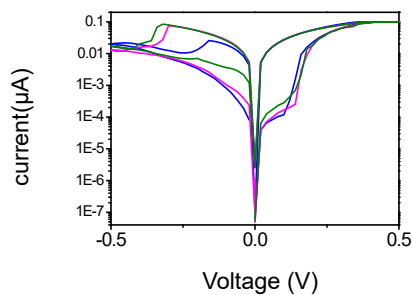

**Figure S10.** The typical  $I-V$  curve of device with free-standing state, compressing state ( $50\text{ kPa}$ ) and recovery state after experiencing pressure.

**Figure S11**

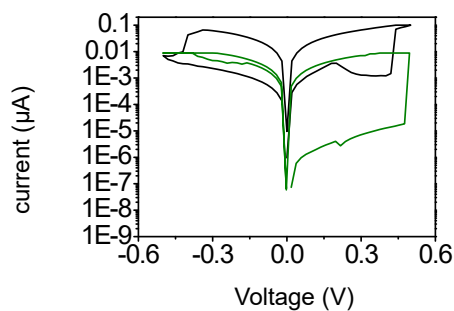

**Figure S11.** The typical  $I-V$  curve of device with of memorisistor Pt/PEDOT:PSS-ion gel/Au (green line) and Pt/PEDOT:PSS-ion gel/Au (blank line)

**Figure S12**

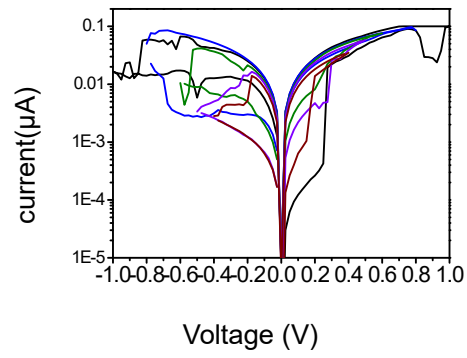

**Figure S12.** The typical  $I$ - $V$  curve of device with P3HT as active material of memristor under varied sweep range (-1~1V, -0.8V~0.8V, -0.6V~0.6V, -0.4V~0.4V).
